# Supplementary material for: Neutralizing Antibody Production in Asymptomatic and Mild COVID-19 Patients, in Comparison with Pneumonic COVID-19 Patients
Source: J Clin Med. 2020 Jul 17;9(7):2268. doi: 10.3390/jcm9072268 (PMC7408950; doi:10.3390/jcm9072268)
Supplement: Supplementary file 1 [file jcm-09-02268-s001.pdf]

## Supplementary Materials

**Table S1.** Clinical characteristics of asymptomatic to severe COVID-19 patients, according to the detailed severity groups.

|                                    | Asymptomatic<br>group<br><i>n</i> = 6 | Anosmia/dysgeusia<br>group<br><i>n</i> = 9 | Mild<br>symptomatic<br>group<br><i>n</i> = 29 | Mild febrile<br>group<br><i>n</i> = 20 | Pneumonia<br>group<br><i>n</i> = 18* |
|------------------------------------|---------------------------------------|--------------------------------------------|-----------------------------------------------|----------------------------------------|--------------------------------------|
| <b>Age</b>                         | 25.2 ± 5.95                           | 31.0 ± 8.67                                | 29.3 ± 8.78                                   | 32.8 ± 9.64                            | 65.7 ± 13.2                          |
| <b>Male sex</b>                    | 4 (66.7%)                             | 4 (44.9%)                                  | 12 (41.4%)                                    | 8 (40.0%)                              | 3 (50%)                              |
| <b>Underlying disease</b>          | 0 (0%)                                | 0 (0%)                                     | 0 (0%)                                        | 0 (0%)                                 | 6 (100%) <sup>†</sup>                |
| <b>Symptom, duration</b>           |                                       |                                            |                                               |                                        |                                      |
| Anomia and/or dysgeusia            | 0 (0%),<br>NA                         | 9 (100%), 14 (5.5–21.0)                    | 11 (37.9%),<br>16.0 (9.0–30.0)                | 5 (25.0%),<br>21.0 (5.5–25.5)          | 0 (0%),<br>NA                        |
| Rhinorrhea and/or nasal stuffiness | 0 (0%),<br>NA                         | 0 (0%),<br>NA                              | 12 (41.4%),<br>21.0 (14.0–49.3)               | 5 (25.0%),<br>21.0 (2.0–54.0)          | 0 (0%),<br>NA                        |
| Sore throat                        | 0 (0%),<br>NA                         | 0 (0%),<br>NA                              | 13 (44.8%),<br>7.0 (3.5–13.0)                 | 5 (25.0%), 5.0<br>(2.5–37.0)           | 1 (16.7%),<br>5.0 (NA–NA)            |
| Cough                              | 0 (0%),<br>NA                         | 0 (0%),<br>NA                              | 14 (48.3%),<br>21.0 (8.8–39.3)                | 11 (55.0%),<br>5.0 (3.0–21.0)          | 4 (66.7%),<br>10.5 (4.0–17.8)        |
| Sputum                             | 0 (0%),<br>NA                         | 0 (0%),<br>NA                              | 11 (37.9%),<br>14.0 (7.0–30.0)                | 6 (30.0%), 8.0<br>(6.0–37.3)           | 1 (16.7%),<br>14.0 (NA–NA)           |
| Gastrointestinal symptoms          | 0 (0%),<br>NA                         | 0 (0%),<br>NA                              | 7 (24.1%), 4.0<br>(2.0–7.0)                   | 3 (15.0%), 7.0<br>(3.0–NA)             | 3 (50.0%),<br>7.0 (5–NA)             |
| Headache                           | 0 (0%),<br>NA                         | 0 (0%),<br>NA                              | 5 (17.2%), 2.0<br>(0.5–8.5)                   | 5 (25.0%), 3.0<br>(1.0–5.0)            | 2 (33.3%), 17<br>(5–NA)              |
| Fever, chill, and/or myalgia       | 0 (0%),<br>NA                         | 0 (0%),<br>NA                              | 0 (0%),<br>NA                                 | 20 (100%), 3.0<br>(1.0–5.0)            | 6 (100%),<br>15.0 (7.3–20.8)         |
| <b>Lowest Ct value</b>             | 34.0 (32.4–36.1)                      | 33.5 (32.2–35.4)                           | 32.2 (30.8–33.9)                              | 32.1 (30.7–35.4)                       | 26.4 (19.3–31.1)                     |
| <b>Duration of shedding</b>        |                                       |                                            |                                               |                                        |                                      |
| from symptom onset                 | NA                                    | 34.0 (29.5–41.5)                           | 48.0 (32.5–45.5)                              | 40.0 (34.0–42.0)                       | 29.0 (23.0–38.8)                     |
| from diagnosis                     | 32.5 (31.5–34.0)                      | 31.0 (24.5–42.0)                           | 33.0 (31.0–45.5)                              | 31.5 (27.0–35.5)                       | 23.0 (18.3–37.8)                     |
| <b>Sampling time, days</b>         |                                       |                                            |                                               |                                        |                                      |
| from symptom onset                 | NA                                    | 39.0 (34.5–46.5)                           | 43.0 (37.0–50.0)                              | 43.5 (37.5–47.0)                       | 24.0 (19.8–38.3)                     |
| from diagnosis                     | 37.0 (36.5–38.3)                      | 35.0 (28.5–46.0)                           | 37.0 (34.5–49.5)                              | 35.0 (31.0–39.5)                       | 19.5 (16.8–35.5)                     |

Data are expressed as the number (%) of patients, mean ± standard deviation, or median (interquartile range). \*A total of 18 serum samples were obtained from six pneumonic patients. Two patients with pneumonia underwent endotracheal intubation and symptoms could not be properly assessed. <sup>†</sup>Six (100%) patients had diabetes mellitus, two (33.3%) had hypertension, one (16.7%) had dyslipidemia, one (16.7%) had stable angina, one (16.7%) had gout, and one (16.7%) had thyroid cancer.

Abbreviations: COVID-19, coronavirus disease 2019; NA, not applicable; Ct, cycle threshold of RT-PCR.

**Table S2.** Neutralizing antibody production and serologic tests for asymptomatic to severe COVID-19 patients, according to the detailed severity groups.

|                                  | <b>Asymptomatic<br/>group<br/><i>n</i> = 6</b> | <b>Anosmia/dysgeusia<br/>group<br/><i>n</i> = 9</b> | <b>Mild<br/>symptomatic<br/>group<br/><i>n</i> = 29</b> | <b>Mild febrile<br/>group<br/><i>n</i> = 20</b> | <b>Pneumonia<br/>group<br/><i>n</i> = 18*</b> |
|----------------------------------|------------------------------------------------|-----------------------------------------------------|---------------------------------------------------------|-------------------------------------------------|-----------------------------------------------|
| <b>Neutralizing<br/>antibody</b> |                                                |                                                     |                                                         |                                                 |                                               |
| Positive, titer<br>≥1:10         | 5 (83.3%)                                      | 7 (77.8%)                                           | 26 (89.7%)                                              | 20 (100%)                                       | 18 (100%)                                     |
| High MN titer,<br>≥1:80          | 1 (16.7%)                                      | 2 (22.2%)                                           | 11 (37.9%)                                              | 7 (35.0%)                                       | 18 (100%)                                     |
| <b>FIA, IgG</b>                  |                                                |                                                     |                                                         |                                                 |                                               |
| Positive, COI ≥1.1               | 6 (100%)                                       | 9 (100%)                                            | 28 (96.6%)                                              | 20 (100%)                                       | 18 (100%)                                     |
| High COI value,<br>≥15.0         | 4 (66.7%)                                      | 7 (77.8%)                                           | 24 (82.8%)                                              | 20 (100%)                                       | 18 (100%)                                     |
| <b>ELISA, total</b>              |                                                |                                                     |                                                         |                                                 |                                               |
| Positive, OD ≥<br>1.0            | 6 (100%)                                       | 9 (100%)                                            | 27 (93.1%)                                              | 20 (100%)                                       | 18 (100%)                                     |
| High OD ratio, ≥<br>3.0          | 3 (50.0%)                                      | 5 (55.6%)                                           | 19 (65.5%)                                              | 13 (65.5%)                                      | 18 (100%)                                     |

Data are expressed as the number (%) of sera. \*Eighteen sera from six patients. Abbreviations: COVID-19, coronavirus disease 2019; MN, microneutralization; FIA, fluorescence immunoassay; IgG, immunoglobulin G; COI, cut-off index; ELISA, enzyme-linked immunosorbent assay; OD, optical density.

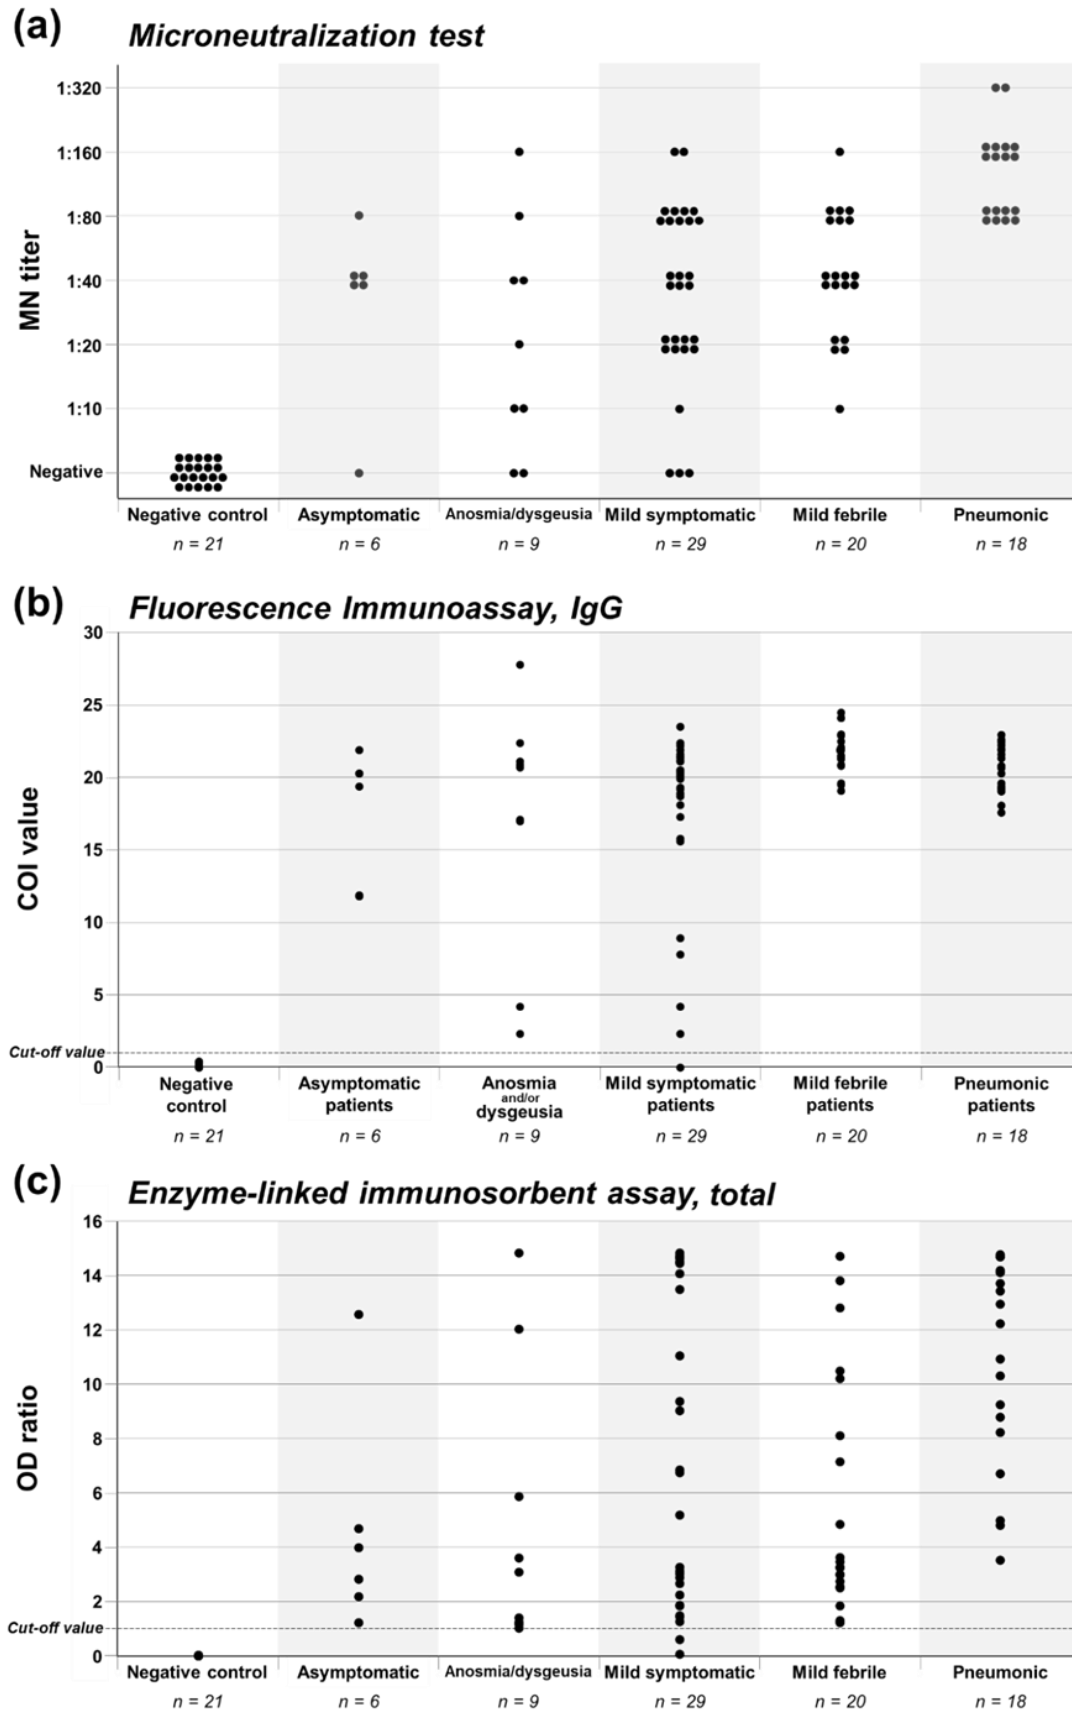

**Figure S1.** Antibody production of asymptomatic to severe COVID-19 patients, according to the detailed severity groups. Antibody production of asymptomatic and mild COVID-19 patients was evaluated in comparison with pneumonic COVID-19 patients. Tests were conducted by (A) MN test,

(B) FIA IgG, and (C) ELISA total antibody test. Abbreviations: COVID-19, coronavirus disease 2019; MN, microneutralization; FIA, fluorescence immunoassay; ELISA, enzyme-linked immunosorbent assay; IgG, immunoglobulin G; COI, cut-off index; OD, optical density.

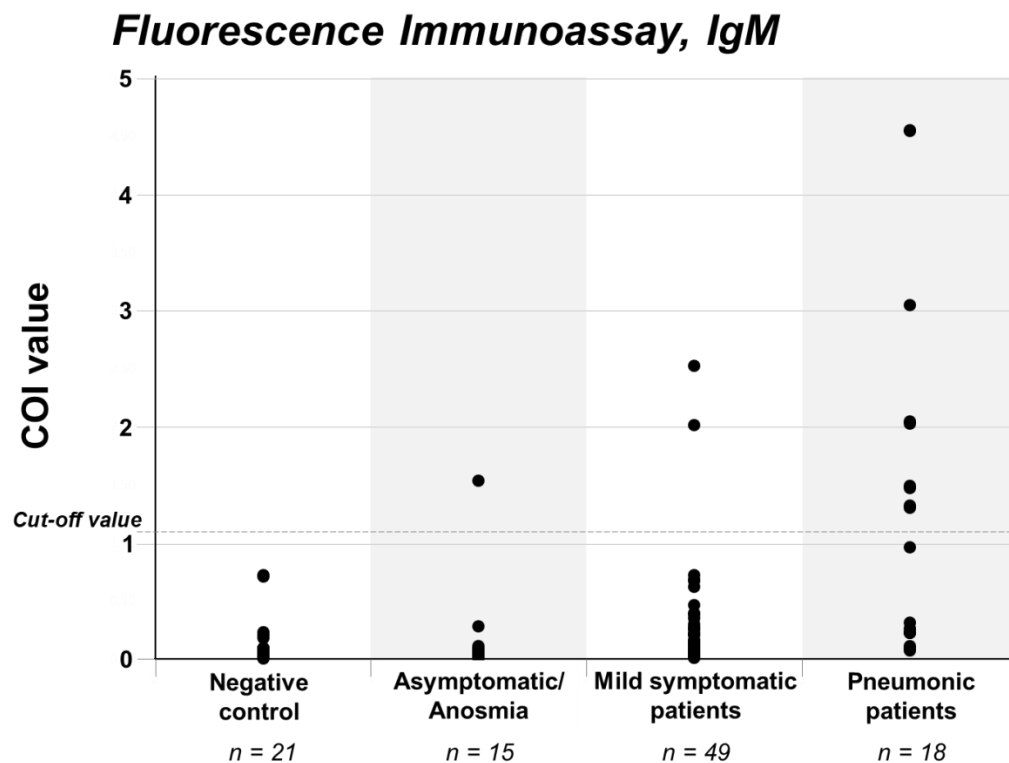

**Figure S2. FIA IgM test for asymptomatic to severe COVID-19 patients.** Overall, the IgM antibody measured by the IFA method was detected in three convalescent sera of asymptomatic to mild COVID-19 patients (asymptomatic to mild febrile groups; 3/64, 4.7%), while nine sera (9/18 sera, 50.0%) from three pneumonic patients (3/6 patients, 50.0%) showed positive for FIA IgM. Abbreviations: FIA, fluorescence immunoassay; IgM, immunoglobulin M; COI, cut-off index; COVID-19, coronavirus disease 2019.

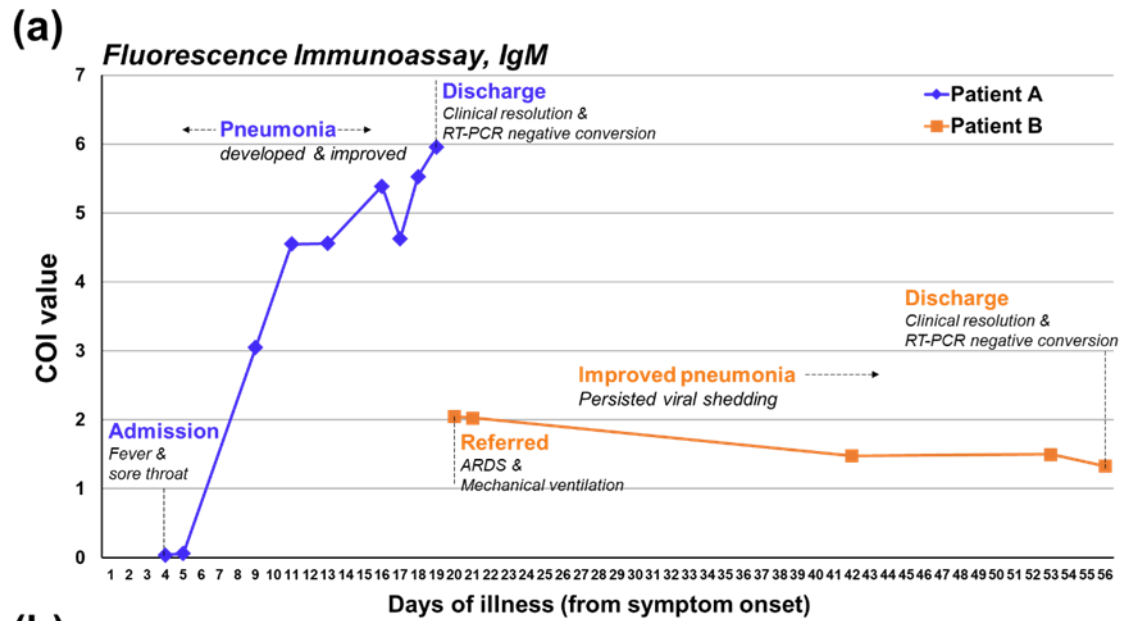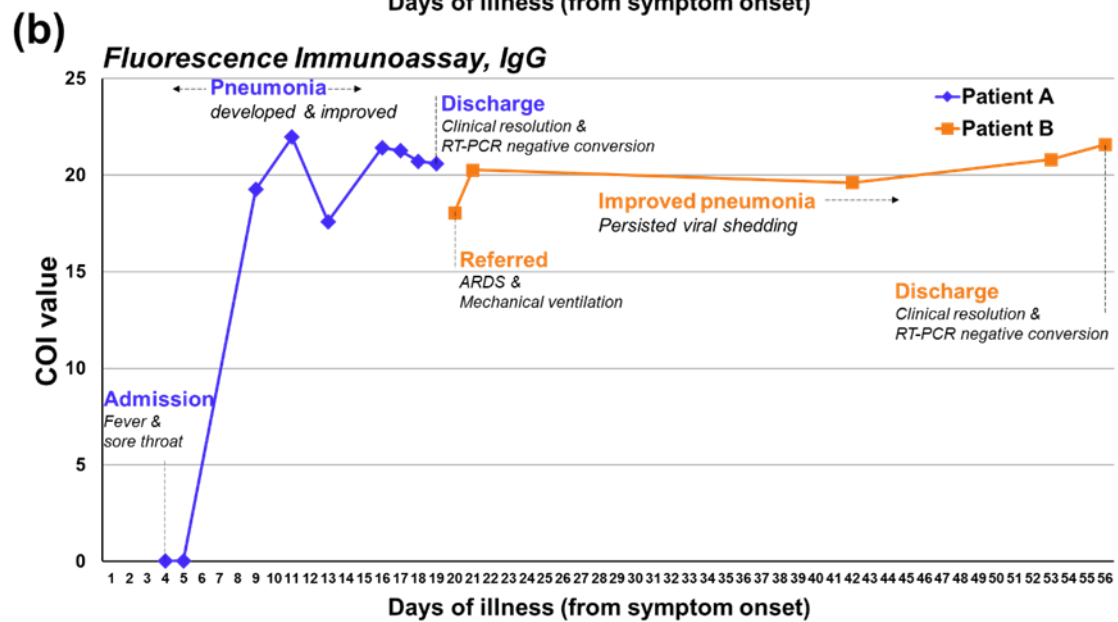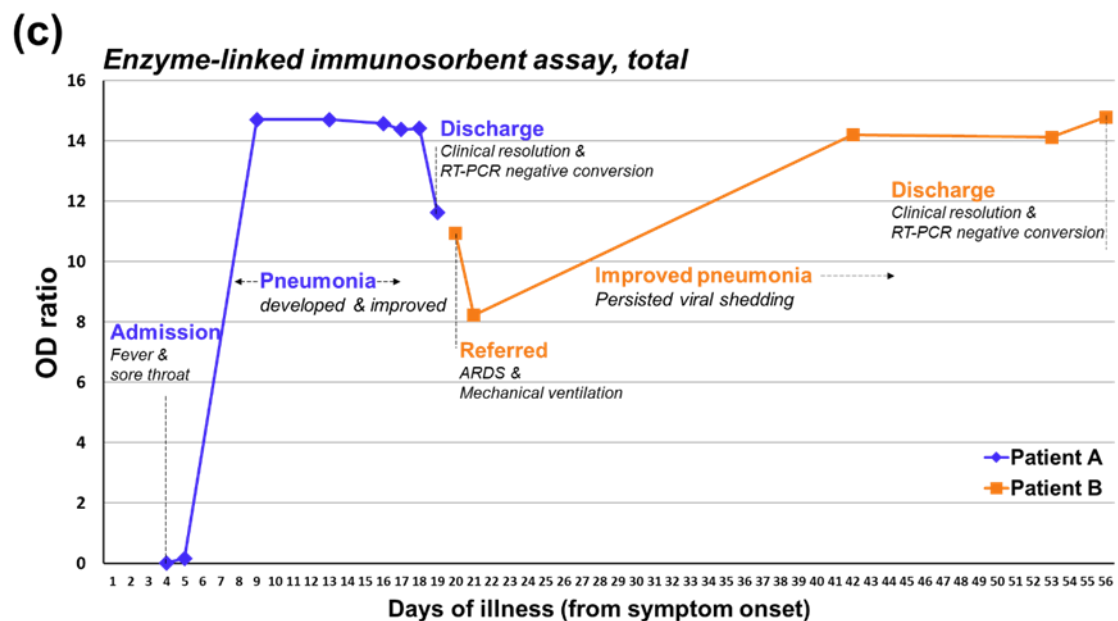

**Figure S3.** Antibody kinetics of two COVID-19 patients with pneumonia, serially measured by FIA IgM (A), FIA IgG (B), and ELISA total antibody test (C). To present the relationship between IgM, IgG, and total antibodies against SARS-CoV-2, antibody kinetics of two COVID-19 patients with pneumonia are presented. Abbreviations: COVID-19, coronavirus disease 2019; FIA, fluorescence immunoassay; IgM, immunoglobulin M; IgG, immunoglobulin G; ELISA, enzyme-linked immunosorbent assay; COI, cut-off index; COVID-19, coronavirus disease 2019.

**Table S3.** Demographics and serologic test results of negative control serum specimens.

| Number | Sex | Age | Respiratory virus             | MN       | FIA      | ELISA    |
|--------|-----|-----|-------------------------------|----------|----------|----------|
| NC 1   | M   | 10  | Coronavirus 229E              | Negative | Negative | Negative |
| NC 2   | M   | 13  | Coronavirus 229E              | Negative | Negative | Negative |
| NC 3   | M   | 53  | Coronavirus 229E              | Negative | Negative | Negative |
| NC 4   | F   | 62  | Coronavirus 229E              | Negative | Negative | Negative |
| NC 5   | M   | 13  | Coronavirus NL63              | Negative | Negative | Negative |
| NC 6   | M   | 48  | Coronavirus OC43              | Negative | Negative | Negative |
| NC 7   | M   | 11  | Influenza A                   | Negative | Negative | Negative |
| NC 8   | M   | 17  | Influenza A                   | Negative | Negative | Negative |
| NC 9   | F   | 53  | Influenza A                   | Negative | Negative | Negative |
| NC 10  | F   | 65  | Influenza A                   | Negative | Negative | Negative |
| NC 11  | F   | 7   | Metapneumovirus               | Negative | Negative | Negative |
| NC 12  | M   | 66  | Metapneumovirus               | Negative | Negative | Negative |
| NC 13  | M   | 16  | Parainfluenza virus 2         | Negative | Negative | Negative |
| NC 14  | M   | 7   | Respiratory syncytial virus B | Negative | Negative | Negative |
| NC 15  | M   | 7   | Respiratory syncytial virus B | Negative | Negative | Negative |
| NC 16  | M   | 42  | Respiratory syncytial virus B | Negative | Negative | Negative |
| NC 17  | M   | 73  | Respiratory syncytial virus B | Negative | Negative | Negative |
| NC 18  | F   | 11  | Rhinovirus                    | Negative | Negative | Negative |
| NC 19  | F   | 12  | Rhinovirus                    | Negative | Negative | Negative |
| NC 20  | F   | 52  | Rhinovirus                    | Negative | Negative | Negative |
| NC 21  | M   | 67  | Rhinovirus                    | Negative | Negative | Negative |

Abbreviations: MN, microneutralization; FIA, fluorescence immunoassay; ELISA, enzyme-linked immunosorbent assay; IgG, immunoglobulin G; COI, cut-off index.
